# Supplementary material
Source: PubMed Central journal article supplement (PMC4505258)
Supplement: AAC.04694-14_zac008154205so1.pdf [file AAC.04694-14_zac008154205so1.pdf]

## SUPPLEMENTAL FIGURES

### Characterization of *Trypanosoma cruzi* sirtuins as possible drug targets for Chagas Disease

Moretti et al.

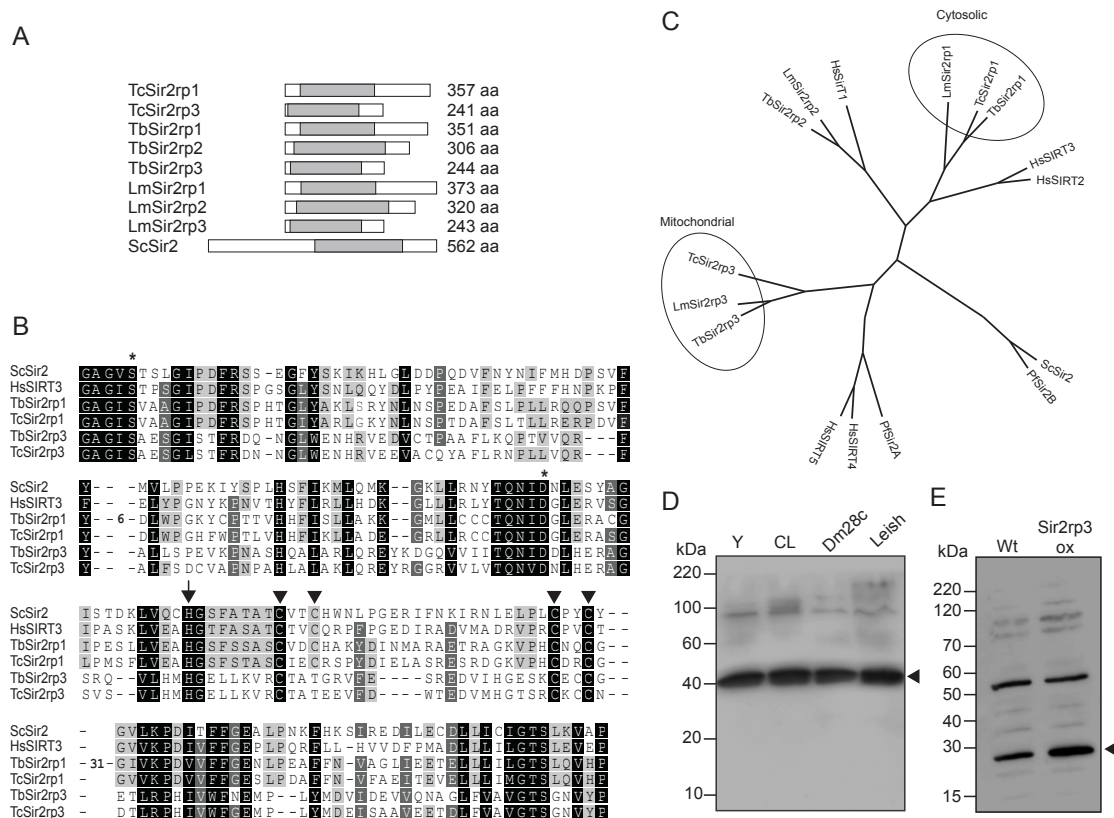

**FIG S1. *T. cruzi* sirtuins amino acid sequence analysis.** (A) Schematic representation of *T. cruzi* sirtuin domain (showed in grey) compared with *L. major* (LmSir2rp1-3), *T. brucei* (TbSir2rp1-3) and *S. cerevisiae* (ScSir2). (B) ClustalW amino acid sequence alignment between the core deacetylase domain of *T. cruzi* sirtuins and sirtuins of *S. cerevisiae* (ScSir2, NP\_010242), *H. sapiens* (HsSIRT3, NP\_036371.1), and *T. brucei* TbSir2rp1, AAX70528.1 and TbSir2rp3, AAX79070.1). Arrowheads indicate a putative Zn<sup>2+</sup>-binding motif, arrow indicates critical catalytic residues, and asterisks correspond to NAD<sup>+</sup>-binding sites. (C) Unrooted tree derived from phylogenetic analysis of the above sequences based in the Neighbor-Joining (NJ) method using the Clustal 1.8 and TreeView. *S. cerevisiae* (ScSir2, NP\_010242), *H. sapiens* (HsSIRT1, AAH12499.1; HsSIRT2, AAK51133.1; HsSIRT3, NP\_036371.1; HsSIRT4, NP\_036372.1 and HsSIRT5, Q9NXA8.2); *T. brucei* TbSir2rp1, AAX70528.1; TbSir2rp2, AAZ13079 and TbSir2rp3, AAX79070.1); *L. major* (LmSir2rp1, CAJ040546; LmSir2rp2, CAJ04804 and LmSir2rp3, CAJ07927); *P. falciparum* (PfSir2A, Q8IE47.1; PfSir2B, Q8IKW2.1). (D) Western blot of total extracts of 1 x 10<sup>7</sup> epimastigotes of Y, CL-Brener (CL), Dm28c and promastigotes forms of *Leishmania major* (Leish) probed with anti-Sir2rp1. (E) Western blot of total extracts of 1 x 10<sup>7</sup> epimastigotes of wild type Y strain, or the Y strain overexpressing TcSir2rp3 probed with anti-Tc-Sir2rp3. Size markers are shown on the left side of each panel.

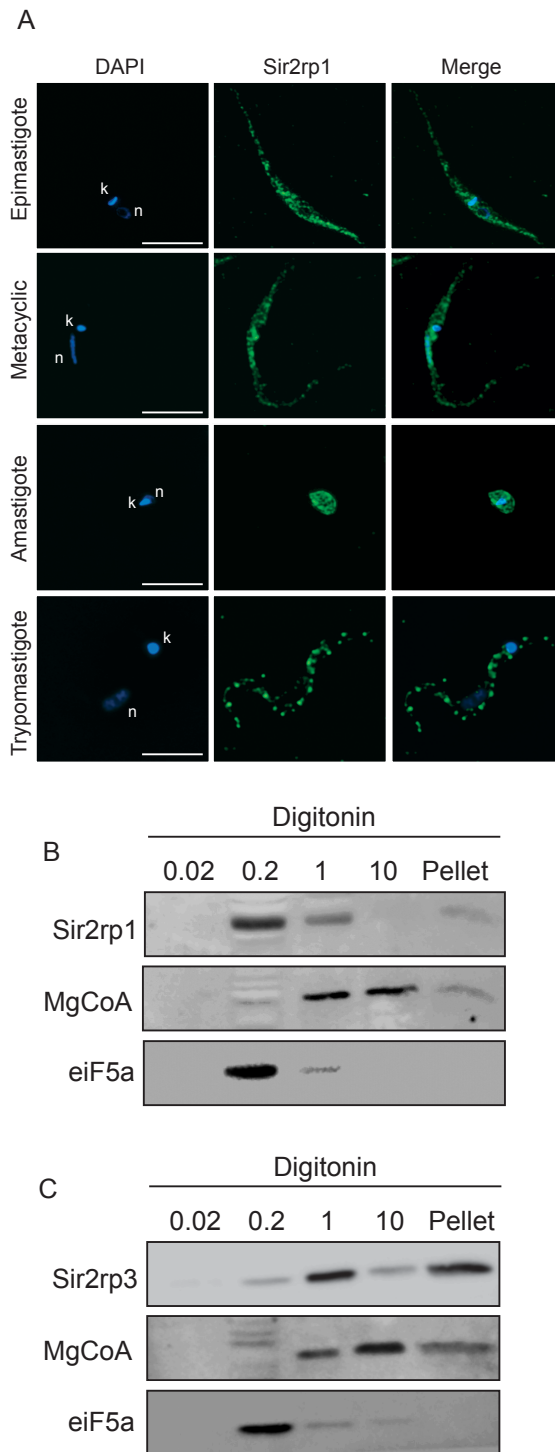

**FIG S2. Subcellular localization of TcSir2rp1 and TcSir2rp3.** (A) Immunofluorescence of epimastigotes, metacyclic-trypomastigotes, intracellular amastigotes and trypomastigotes derived from mammalian cells, probed with anti-Sir2rp1. The TcSir2rp1 labeling is shown in green and the DAPI in blue. Bar = 5  $\mu$ m. Western blot of solubilized proteins extracted with digitonin at the indicated concentrations in mM of TcSir2rp1-ox (B) and TcSir2rp3-ox (C) parasites probed with anti-HA antibodies for TcSir2rp1-ox and the indicated antibodies for the other blots.

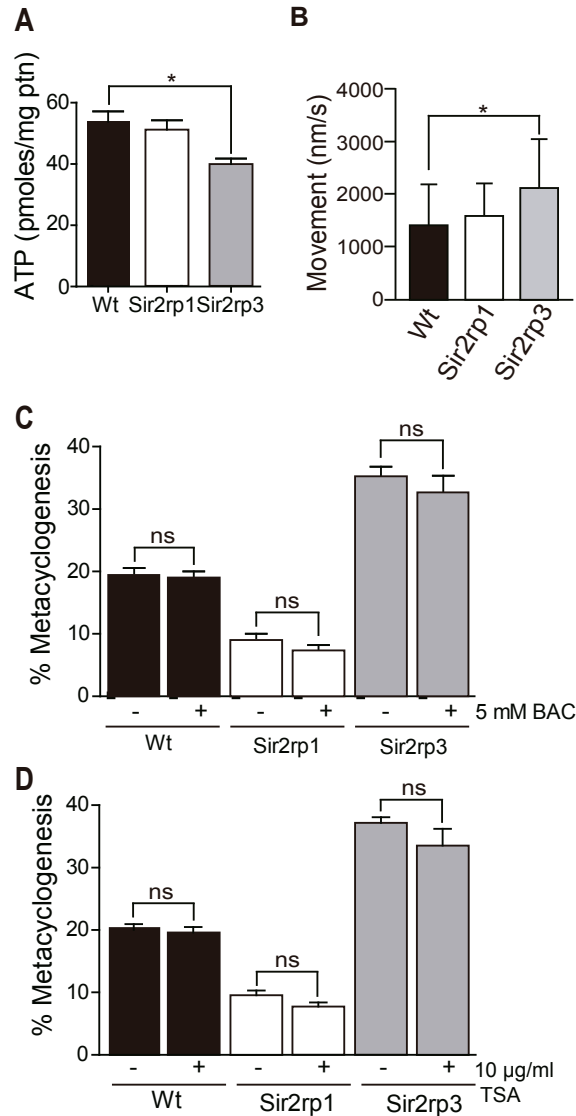

**FIG S3. Phenotypic analysis of the sirtuin overexpressors.** Panel (A) panel (B) shows respectively the intracellular ATP levels and the movement of wild type (dark bars), TcSir2rp1-ox (empty bars), and TcSir2rp3-ox (grey bars) epimastigotes. (C) and (D) show respectively the metacyclogenesis in the absence (-) and presence (+) of 5 mM butyric acid (BAC) or 10 µg/ml trichostatin A using wild type (dark bars); TcSir2rp1-ox (empty bars) and TcSir2rp3-ox (grey bars) epimastigotes. The values are mean  $\pm$  standard deviation (n = 3) \* (p<0.01).

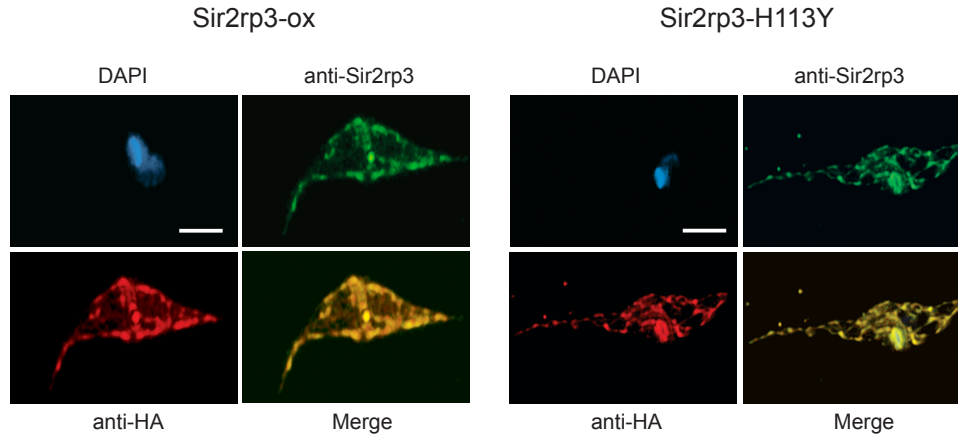

**FIG S4. Wild type and overexpressor TcSir2rp3 have similar localizations.** Indirect immunofluorescences of TcSir2rp3-ox and TcSir2rp3-His113Y epimastigotes using anti-Sir2rp3 (green) and anti-HA (red). The figures also show the DAPI labeling and the merged fluorescence. Bars = 2.5  $\mu$ m.



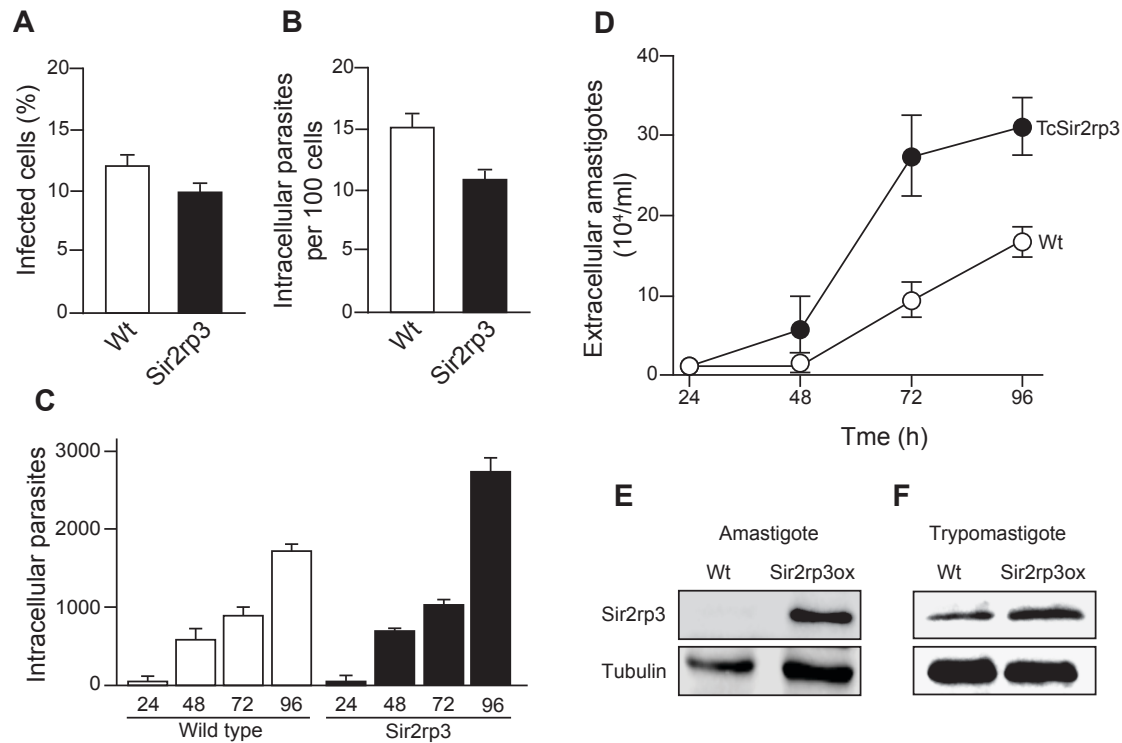

**FIG S5. Trypomastigote invasion is decreased while intracellular multiplication is enhanced in TcSir2rp3 overexpressors resulting in the release of amastigotes.** Wild type and TcSir2rp3-ox trypomastigotes were incubated for 1h with LLC-MK<sub>2</sub> cells and the number of infected cells (**A**) and intracellular parasites (**B**) measured after infection. Panel (**C**) shows the number of intracellular parasites following invasion of wild type and TcSir2rp3-ox parasites. The numbers are mean  $\pm$  standard deviation of triplicates. (**D**) Shows the number of extracellular amastigotes released from infected mammalian cells during the progression of infection with trypomastigotes from wild type (empty circles) and TcSir2rp3-ox (dark circles) parasites. (**E**) and (**F**) Western blots of wild type and TcSir2rp3ox intracellular amastigotes and trypomastigotes revealed with anti-TcSir2rp3 and anti- $\alpha$ -tubulin antibodies.

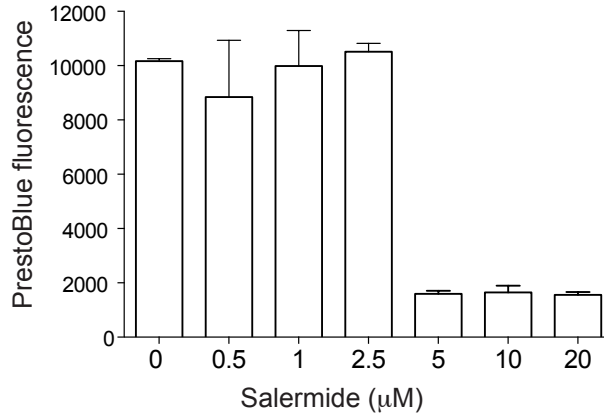

**FIG S6 Cytotoxicity of salermide to LLCMK<sub>2</sub> cells.** Cell viability was determined for the different concentrations of concentrations of salermide incubated after 48 h using PrestoBlue Viability reagent. The numbers are mean ± standard deviation (n = 3), and the experiment was repeated three times.
